# Supplementary material for: A first-in-human Phase I dose-escalation trial of the novel therapeutic peptide, ALM201, demonstrates a favourable safety profile in unselected patients with ovarian cancer and other advanced solid tumours
Source: PubMed Central journal article supplement (PMC9276671; doi:10.1038/s41416-022-01780-z), 2022-05-14
Supplement: 41416_2022_1780_MOESM1_ESM.pdf [file 41416_2022_1780_MOESM1_ESM.pdf]

**Table S1. Geometric mean plasma concentrations of ALM201 following subcutaneous administration on Day 1 of treatment cycle 1 at doses of 10, 20, 40, 80, 100, 160, 200 or 300 mg**

| Time after Dosing (h)    | ALM201 Plasma Concentration (ng/mL)<br>(Geometric mean (CV%) and range) |         |         |                       |                          |                          |                         |                          |
|--------------------------|-------------------------------------------------------------------------|---------|---------|-----------------------|--------------------------|--------------------------|-------------------------|--------------------------|
|                          | 10 mg                                                                   | 20 mg   | 40 mg   | 80 mg                 | 100 mg                   | 160 mg                   | 200 mg                  | 300 mg                   |
| <b>Day 1<br/>Cycle 1</b> | (n = 1)                                                                 | (n = 1) | (n = 1) | (n = 3)               | (n = 4)                  | (n = 3)                  | (n = 4)                 | (n = 3)                  |
| Pre-dose                 | NQ                                                                      | NQ      | NQ      | NQ                    | NQ                       | NQ                       | NQ                      | NQ                       |
| 0.25                     | 106                                                                     | 136     | 316     | 292 (73)<br>192 – 620 | 492 (87)<br>160 – 801    | 833 (47)<br>507 – 1190   | 479 (84)<br>250 – 1360  | 1050 (130)<br>491 – 3240 |
| 0.75                     | 150                                                                     | 368     | 556     | 700 (16)<br>585 – 784 | 1220 (99)<br>377 – 2650  | 1570 (22)<br>1220 – 1840 | 1040 (61)<br>492 – 1900 | 1970 (33)<br>1380 – 2550 |
| 1.5                      | 200                                                                     | 542     | 592     | 800 (14)<br>678 – 872 | 1810 (124)<br>465 – 4600 | 1670 (19)<br>1490 – 2080 | 1240 (41)<br>802 - 2090 | 2250 (38)<br>1710 – 3420 |
| 2                        | 199                                                                     | 417     | 540     | 727 (32)<br>507 – 892 | 1590 (126)<br>398 – 3910 | 1480 (17)<br>1290 – 1790 | 1370 (52)<br>802 – 2270 | 2310 (41)<br>1820 – 3650 |
| 3                        | 153                                                                     | 224     | 368     | 689 (18)<br>572 – 824 | 1150 (272)<br>131 – 2930 | 1280 (50)<br>903 – 2190  | 1360 (53)<br>890 – 2690 | 2120 (19)<br>1840 – 2630 |
| 4                        | NQ                                                                      | NQ      | 223     | 556 (16)<br>486 - 664 | 922 (282)<br>101 – 2300  | 866 (30)<br>708 - 1210   | 1050 (29)<br>789 – 1380 | 1600 (32)<br>1130 – 2100 |
| 5                        | NQ                                                                      | NQ      | 158     | 359 (40)<br>233 – 480 | 664 (198)*<br>NQ – 1330  | 510 (20)<br>463 – 640    | 620 (56)<br>306 – 1070  | 1280 (26)<br>980 – 1630  |
| 6                        | NQ                                                                      | NQ      | NQ      | 248 (32)<br>194 – 350 | 560 (166)*<br>NQ - 1030  | 283 (10)<br>252 – 304    | 518 (55)<br>274 – 957   | 901 (28)<br>658 -1090    |
| 7                        | NS                                                                      | NS      | NS      | NS                    | NS                       | NS                       | NS                      | 703 (45)<br>502 – 1140   |
| 8                        | NS                                                                      | NS      | NS      | NS                    | NS                       | NS                       | NS                      | 420 (55)<br>282 – 753    |
| 22                       | NQ                                                                      | NQ      | NQ      | NQ                    | NQ                       | NQ                       | NQ                      | NQ                       |

NS = no sample received; NQ = not quantifiable (less than assay limit of quantification of 100 ng/mL); \* NQ = value substituted with assay limit of quantification (100 ng/mL) in calculation of geometric mean
