# Supplementary material for: A first-in-human Phase I dose-escalation trial of the novel therapeutic peptide, ALM201, demonstrates a favourable safety profile in unselected patients with ovarian cancer and other advanced solid tumours
Source: PubMed Central journal article supplement (PMC9276671; doi:10.1038/s41416-022-01780-z), 2022-05-14
Supplement: 41416_2022_1780_MOESM2_ESM.pdf [file 41416_2022_1780_MOESM2_ESM.pdf]

**Table S2. Geometric mean plasma concentrations of ALM201 following subcutaneous administration on Day 3 and Day 18 of treatment cycle 1 at doses of 10, 20, 40, 80, 100, 160, 200 or 300 mg**

| Time after Dosing (h)     | ALM201 Plasma Concentration (ng/ml)<br>(Geometric mean (CV%) and range) |         |         |                          |                          |                          |                          |                          |
|---------------------------|-------------------------------------------------------------------------|---------|---------|--------------------------|--------------------------|--------------------------|--------------------------|--------------------------|
|                           | 10 mg                                                                   | 20 mg   | 40 mg   | 80 mg                    | 100 mg                   | 160 mg                   | 200 mg                   | 300 mg                   |
| <b>Day 3<br/>Cycle 1</b>  | (n = 1)                                                                 | (n = 1) | (n = 1) | (n = 3)                  | (n = 4)                  | (n = 3)                  | (n = 4)                  | (n = 3)                  |
| Pre-dose                  | NQ                                                                      | NQ      | NQ      | NQ                       | NQ                       | NQ                       | NQ                       | NQ                       |
| 0.5                       | 406                                                                     | 210     | 264     | 578 (58)<br>321 – 920    | 1730 (38)<br>1180 – 2560 | 956 (8)<br>875 – 1030    | 1090 (81)<br>637 – 3000  | 1970 (30)<br>1620- 2770  |
| 1                         | 325                                                                     | 614     | 444     | 684 (40)<br>445 – 935    | 2100 (48)<br>1250 – 3670 | 1270 (8)<br>1160 – 1350  | 1410 (70)*<br>818 - 2830 | 2590 (24)<br>2050 – 3260 |
| 1.5                       | 294                                                                     | 532     | 759     | 827 (25)<br>679 – 1090   | 2530 (56)<br>1430 - 4280 | 1460 (11)<br>1350 – 1660 | 1320 (69)<br>703 – 3100  | 1950 (NC)<br>1650 – 2300 |
| 2                         | 242                                                                     | 377     | 656     | 826 (16)<br>742 – 996    | 2400 (50)<br>1450 – 3660 | 1350 (10)<br>1200 – 1430 | 1540 (37)<br>1160 – 2590 | 2450 (NC)<br>2300 – 2620 |
| 3.5                       | 127                                                                     | 134     | NS      | 524 (28)<br>399 – 697    | 1690 (32)<br>1080 – 2120 | 926 (2)<br>909 – 935     | 1250 (49)<br>904 - 2480  | NS                       |
| 4.5                       | NS                                                                      | NS      | NS      | NS                       | NS                       | NS                       | NS                       | 1740 (29)<br>1260 – 2130 |
| 5                         | NQ                                                                      | NQ      | NS      | 325 (36)<br>241 – 477    | 928 (26)<br>699 – 1210   | 613 (10)<br>544 – 651    | 958 (43)<br>681 – 1650   | NS                       |
| 7                         | NS                                                                      | NS      | NS      | NS                       | NS                       | NS                       | NS                       | 852 (48)<br>526 – 1290   |
| <b>Day 18<br/>Cycle 1</b> | (n = 1)                                                                 | (n = 1) | (n = 1) | (n = 2)                  | (n = 2)                  | (n = 3)                  | (n = 3)                  | (n = 3)                  |
| Pre-dose                  | NQ                                                                      | NQ      | NQ      | NQ                       | NQ                       | NQ                       | NQ                       | NQ                       |
| 0.5                       | 188                                                                     | 194     | 348     | 769 (NC)<br>538 - 1100   | 1890 (NC)<br>1450 – 2460 | 940 (41)<br>631 – 1400   | 811 (105)<br>353 – 1970  | 2290 (12)<br>2120 – 2640 |
| 1                         | 283                                                                     | 319     | 405     | 946 (NC)<br>814 – 1100   | 1840 (NC)<br>1830 – 1850 | 1150 (16)<br>964 – 1290  | 1260 (82)<br>625 – 2630  | 2410 (3)<br>2330 – 2490  |
| 1.5                       | 352                                                                     | 314     | 397     | 884 (NC)<br>834 – 937    | 2210 (NC)<br>2140 – 2280 | 1280 (4)<br>1240 - 1330  | 1670 (NC)<br>1050 – 2670 | 2600 (26)<br>2090 – 3450 |
| 2                         | 325                                                                     | 224     | 368     | 1065 (NC)<br>1040 – 1090 | 2130 (NC)<br>1790 – 2530 | 1200 (16)<br>1050 – 1420 | 1580 (NC)<br>868 – 2880  | 2520 (21)<br>1980 – 2870 |
| 3.5                       | 113                                                                     | 113     | 377     | 545 (NC)<br>460 – 646    | 1490 (NC)<br>1310 – 1700 | 995 (9)<br>902 – 1080    | 1130 (45)<br>693 – 1580  | NS                       |
| 4.5                       | NS                                                                      | NS      | NS      | NS                       | NS                       | NS                       | NS                       | 1370 (25)<br>1170 – 1820 |
| 5                         | NQ                                                                      | NQ      | 113     | 407 (NC)<br>328 – 504    | 961 (NC)<br>776 - 1190   | 577 (16)<br>488 – 674    | 890 (34)<br>619 -1170    | NS                       |
| 7                         | NS                                                                      | NS      | NS      | NS                       | NS                       | NS                       | NS                       | 767 (80)<br>418 – 1650   |

NS = no sample received; NC = not calculated (n = 2 values); NQ = not quantifiable (less than assay limit of quantification of 100 ng/mL); \*n = 3
