# Supplementary material for: A first-in-human Phase I dose-escalation trial of the novel therapeutic peptide, ALM201, demonstrates a favourable safety profile in unselected patients with ovarian cancer and other advanced solid tumours
Source: PubMed Central journal article supplement (PMC9276671; doi:10.1038/s41416-022-01780-z), 2022-05-14
Supplement: 41416_2022_1780_MOESM3_ESM.pdf [file 41416_2022_1780_MOESM3_ESM.pdf]

**Table S3. Geometric mean plasma concentrations of ALM201 following subcutaneous administration on Day 18 of treatment cycle 2, 4 and 6 at doses of 10, 20, 40, 80, 100, 160, 200 or 300 mg**

| Time after Dosing (h)     | ALM201 Plasma Concentration (ng/mL)<br>(Geometric mean (CV%) and range) |         |         |         |         |         |                          |                          |
|---------------------------|-------------------------------------------------------------------------|---------|---------|---------|---------|---------|--------------------------|--------------------------|
|                           | 10 mg                                                                   | 20 mg   | 40 mg   | 80 mg   | 100 mg  | 160 mg  | 200 mg                   | 300 mg                   |
| <b>Day 18<br/>Cycle 2</b> | (n = 1)                                                                 | (n = 1) | (n = 1) | (n = 1) | (n = 1) | (n = 1) | (n = 2)                  | (n = 3)                  |
| Pre-dose                  | NQ                                                                      | NQ      | NQ      | NQ      | NQ      | NQ      | NQ                       | NQ                       |
| 0.5                       | 158                                                                     | 279     | 384     | 394     | 1060    | 1380    | 1210 (NC)<br>908 – 1620  | 1990 (42)<br>1460 – 3150 |
| 1                         | 193                                                                     | 394     | 583     | 808     | 1790    | 1380    | 1470 (NC)<br>1010 – 2150 | 2280 (39)<br>1810 – 3510 |
| 1.5                       | 242                                                                     | 352     | 565     | 659     | 1710    | 1650    | 1890 (NC)<br>1280 – 2790 | 2380 (55)<br>1750 – 4130 |
| 2                         | 288                                                                     | 386     | 571     | 639     | 1570    | 1870    | 1360 (NC)<br>1240 - 1500 | 2540 (23)<br>2110 – 3290 |
| 3.5                       | 161                                                                     | 162     | 347     | 849     | 1180    | 870     | 911 (NC)<br>486 – 1710   | 720 (206)*<br>169 – 1970 |
| 5                         | NQ                                                                      | NQ      | 228     | 505     | 535     | 436     | 690 (NC)<br>353 – 1350   | 485 (58) **<br>282 - 825 |
| <b>Day 18<br/>Cycle 4</b> | (n = 1)                                                                 |         |         |         |         |         | (n = 2)                  | (n = 1)                  |
| Pre-dose                  | NQ                                                                      | NS      | NS      | NS      | NS      | NS      | NQ                       | NQ                       |
| 0.5                       | NQ                                                                      | NS      | NS      | NS      | NS      | NS      | 1080 (NC)<br>479 – 2430  | 1670                     |
| 1                         | 176                                                                     | NS      | NS      | NS      | NS      | NS      | 1410 (NC)<br>1100 - 1800 | 2140                     |
| 1.5                       | 193                                                                     | NS      | NS      | NS      | NS      | NS      | 1150 (NC)<br>734 – 1810  | 1990                     |
| 2                         | 171                                                                     | NS      | NS      | NS      | NS      | NS      | 1500 (NC)<br>876 – 2580  | 1990                     |
| 3.5                       | 157                                                                     | NS      | NS      | NS      | NS      | NS      | 1310 (NC)<br>970 -1760   | 854*                     |
| 5                         | NQ                                                                      | NQ      | 228     | 505     | 535     | 436     | 975 (NC)<br>889 – 1070   | 387**                    |
| <b>Day 18<br/>Cycle 6</b> | (n = 1)                                                                 |         |         |         |         |         |                          | (n = 1)                  |
| Pre-dose                  | NQ                                                                      | NS      | NS      | NS      | NS      | NS      | NS                       | NQ                       |
| 0.5                       | 171                                                                     | NS      | NS      | NS      | NS      | NS      | NS                       | 3150                     |
| 1                         | NS                                                                      | NS      | NS      | NS      | NS      | NS      | NS                       | 4430                     |
| 1.5                       | 470                                                                     | NS      | NS      | NS      | NS      | NS      | NS                       | 5240                     |
| 2                         | 403                                                                     | NS      | NS      | NS      | NS      | NS      | NS                       | 6830                     |
| 3.5                       | 179                                                                     | NS      | NS      | NS      | NS      | NS      | NS                       | 3600*                    |
| 5                         | NS                                                                      | NS      | NS      | NS      | NS      | NS      | NS                       | 693**                    |

NS = no sample received; NC = not calculated (n = 2 values); NQ = not quantifiable (less than assay limit of quantification of 100 ng/mL); \*Samples collected at 4.5 hours; \*\*Samples collected at 7.0 hours
