# Supplementary material for: A first-in-human Phase I dose-escalation trial of the novel therapeutic peptide, ALM201, demonstrates a favourable safety profile in unselected patients with ovarian cancer and other advanced solid tumours
Source: PubMed Central journal article supplement (PMC9276671; doi:10.1038/s41416-022-01780-z), 2022-05-14
Supplement: 41416_2022_1780_MOESM4_ESM.pdf [file 41416_2022_1780_MOESM4_ESM.pdf]

**Table 4. Derived pharmacokinetic parameters for ALM201 following subcutaneous administration on Days 1, 3 and 18 of treatment cycle 1 at doses of 10, 20, 40, 80, 100, 160, 200 or 300 mg**

| Parameter                    | Summary<br>Statistic | Dose Level (mg) |         |         |             |              |             |              |               |
|------------------------------|----------------------|-----------------|---------|---------|-------------|--------------|-------------|--------------|---------------|
|                              |                      | 10 mg           | 20 mg   | 40 mg   | 80 mg       | 100 mg       | 160 mg      | 200 mg       | 300 mg        |
| <b>Day 1<br/>Cycle 1</b>     |                      | (n = 1)         | (n = 1) | (n = 1) | (n = 3)     | (n = 4)      | (n = 3)     | (n = 4)      | (n = 3)       |
| C <sub>max</sub> (ng/mL)     | Gmean (CV)           | 200             | 542     | 592     | 835 (10)    | 1810 (124)   | 1990 (12)   | 1490 (53)    | 2550 (32)     |
|                              | Range                |                 |         |         | 749 – 892   | 465 – 4600   | 1730 – 2190 | 890 -2690    | 2100 - 3650   |
| t <sub>max</sub> (h)         | Median               | 1.45            | 1.5     | 1.63    | 1.53        | 1.5          | 1.52        | 2.5          | 2             |
|                              | Range                |                 |         |         | 0.75 – 2.0  | 1.30 – 1.50  | 0.80 – 3.07 | 1.50 – 3.08  | 0.75 – 4.00   |
| AUC <sub>0-t</sub> (ng.h/mL) | Gmean (CV)           | 485             | 1040    | 1920    | 3380 (10)   | 6280 (167)   | 6510 (15)   | 5860 (48)    | 11900 (24)    |
|                              | Range                |                 |         |         | 3100 - 3790 | 1140 – 14800 | 5600 - 7560 | 3460 – 10200 | 9470 – 15100  |
| <b>Day 3<br/>Cycle 1</b>     |                      | (n = 1)         | (n = 1) | (n = 1) | (n = 3)     | (n = 4)      | (n = 3)     | (n = 4)      | (n = 3)       |
| C <sub>max</sub> (ng/mL)     | Gmean (CV)           | 406             | 614     | 759     | 861 (21)    | 2750 (50)    | 1490 (10)   | 1620 (47)    | 2690 (18)     |
|                              | Range                |                 |         |         | 762 – 1090  | 1450 - 4280  | 1390 – 1660 | 1160 – 3100  | 2300 – 3260   |
| t <sub>max</sub> (h)         | Median               | 0.5             | 1       | 1.5     | 1.5         | 1.61         | 1.52        | 2            | 1.02          |
|                              | Range                |                 |         |         | 1.05 – 2.0  | 0.50 – 2.02  | 1.52 – 2.05 | 1.48 – 2.00  | 1.00 – 2.00   |
| AUC <sub>0-t</sub> (ng.h/mL) | Gmean (CV)           | 868             | 1160    | 898     | 2970 (13)   | 8870 (38)    | 5100 (3)    | 6630 (55)    | 12500 (17)    |
|                              | Range                |                 |         |         | 2660 - 3430 | 5380 - 12800 | 4970 – 5280 | 4460 – 11900 | 10500 – 14700 |
| <b>Day 18<br/>Cycle 1</b>    |                      | (n = 1)         | (n = 1) | (n = 1) | (n = 2)     | (n = 2)      | (n = 3)     | (n = 3)      | (n = 3)       |
| C <sub>max</sub> (ng/mL)     | Gmean (CV)           | 352             | 319     | 405     | 1090 (NC)   | 2330 (NC)    | 1350 (7)    | 1670 (50)    | 2880 (18)     |
|                              | Range                |                 |         |         | 1090 - 1100 | 2140 – 2530  | 1240 – 1420 | 1230 – 2880  | 2420 – 3450   |
| t <sub>max</sub> (h)         | Median               | 1.58            | 1.02    | 1       | 1.23        | 1.9          | 1.5         | 2.03         | 1.5           |
|                              | Range                |                 |         |         | 0.47 – 2.0  | 1.45 – 2.35  | 0.50 – 2.00 | 1.00 – 3.50  | 1.00 – 2.07   |
| AUC <sub>0-t</sub> (ng.h/mL) | Gmean (CV)           | 817             | 718     | 1840    | 3500 (NC)   | 8100 (NC)    | 4930 (10)   | 5570 (55)    | 12100 (6)     |
|                              | Range                |                 |         |         | 3440 - 3570 | 7000 - 9370  | 4400 - 5400 | 3900 - 10000 | 11400 – 12900 |

NC = not calculated (fewer than n = 3 values)
